# Supplementary material for: Effectiveness of one-time endoscopic screening programme in prevention of upper gastrointestinal cancer in China: a multicentre population-based cohort study
Source: PubMed Central journal article supplement — Gut. 2020 Apr 2;70(2):251–60. doi: 10.1136/gutjnl-2019-320200 (PMC7815635; doi:10.1136/gutjnl-2019-320200), 2020-04-02

## Supplementary materials

Effectiveness of one-time endoscopic screening program in prevention of upper gastrointestinal cancer in China: a multi-center population-based cohort study

Table S1. The number of early lesions detected by upper gastrointestinal sites and by center

Table S2. Age-standardized incidence and mortality by upper gastrointestinal sites and by center

Table S3. Sensitivity analysis for incidence and mortality of upper-gastrointestinal cancer with exclusions according to location of study center

Table S4. Baseline characteristics of screened and not screened subjects before and after matching on propensity score

Table S5. Relative risks of incidence and mortality for each cancer type and the number needed to screen to prevent one event in the present follow-up period based on propensity score matched cohort

Table S6. Comparison of potential risk factors between the screened and unscreened subjects

Figure S1. Location of selected centers

Figure S2. Cumulative incidence and mortality from all-site cancer

Figure S3. Cumulative incidence and mortality of upper-gastrointestinal cancer, esophageal cancer, non-cardia gastric cancer and cardia gastric cancer based on propensity score-matched cohort

Figure S4. Cumulative incidence and mortality from all-site cancer based on propensity score-matched cohort

**Table S1. The number of early lesions detected by upper gastrointestinal sites and by center**

| Center    | No of screening | No of biopsies | Esophagus |      |        | Cardia |      |        | Stomach |      |        |
|-----------|-----------------|----------------|-----------|------|--------|--------|------|--------|---------|------|--------|
|           |                 |                | LGIN      | HGIN | Cancer | LGIN   | HGIN | Cancer | LGIN    | HGIN | Cancer |
| Cixian    | 22135           | 12270          | 2031      | 213  | 80     | 465    | 62   | 74     | 87      | 3    | 12     |
| Feicheng  | 23470           | 11563          | 2065      | 163  | 108    | 402    | 40   | 47     | 102     | 6    | 16     |
| Linzhou   | 19805           | 14390          | 2697      | 334  | 85     | 1052   | 142  | 106    | 126     | 12   | 23     |
| Yangcheng | 12460           | 7536           | 1073      | 67   | 39     | 139    | 27   | 38     | 176     | 7    | 12     |
| Yanting   | 22702           | 10512          | 1031      | 166  | 57     | 222    | 25   | 39     | 15      | 3    | 2      |
| Yangzhong | 12768           | 12462          | 188       | 84   | 42     | 20     | 11   | 33     | 30      | 13   | 35     |
| Total     | 113340          | 68733          | 9085      | 1027 | 411    | 2300   | 307  | 337    | 536     | 44   | 100    |

**Table S2. Age-standardized incidence and mortality by upper gastrointestinal sites and by center (1/10<sup>5</sup>)**

| Center    | Esophagus |                        | Cardia  |                        | Stomach |                        |
|-----------|-----------|------------------------|---------|------------------------|---------|------------------------|
|           | Overall   | Truncated <sup>a</sup> | Overall | Truncated <sup>a</sup> | Overall | Truncated <sup>a</sup> |
| Incidence |           |                        |         |                        |         |                        |
| Cixian    | 159.59    | 249.58                 | 45.62   | 92.01                  | 41.01   | 63.25                  |
| Feicheng  | 113.26    | 233.01                 | 22.44   | 55.93                  | 45.60   | 86.70                  |
| Linzhou   | 106.12    | 199.08                 | 67.95   | 154.58                 | 39.67   | 83.63                  |
| Yangcheng | 105.84    | 229.55                 | 53.28   | 120.28                 | 49.16   | 102.10                 |
| Yanting   | 96.69     | 155.21                 | 19.80   | 32.08                  | 80.55   | 116.82                 |
| Yangzhong | 99.25     | 180.14                 | 57.24   | 105.77                 | 68.39   | 121.20                 |
| Mortality |           |                        |         |                        |         |                        |
| Cixian    | 123.47    | 148.43                 | 28.09   | 43.65                  | 35.34   | 45.45                  |
| Feicheng  | 84.13     | 128.68                 | 8.91    | 18.75                  | 41.29   | 60.27                  |
| Linzhou   | 76.88     | 97.56                  | 46.14   | 76.70                  | 30.98   | 52.30                  |
| Yangcheng | 58.99     | 99.34                  | 24.30   | 43.34                  | 30.08   | 51.29                  |
| Yanting   | 62.01     | 93.12                  | 14.59   | 20.70                  | 55.48   | 74.17                  |
| Yangzhong | 58.40     | 87.20                  | 27.8    | 40.46                  | 43.25   | 64.32                  |

<sup>a</sup> Truncated (40-69 years) age-standardized rates

**Table S3. Sensitivity analysis for incidence and mortality of upper-gastrointestinal cancer with exclusions according to location of study center**

| Location            | Incidence               |                      | Mortality               |                      |
|---------------------|-------------------------|----------------------|-------------------------|----------------------|
|                     | RR(95% CI) <sup>a</sup> | P value <sup>b</sup> | RR(95% CI) <sup>a</sup> | P value <sup>b</sup> |
| Total               | 0.77(0.74-0.81)         | <0.001               | 0.43(0.40-0.47)         | <0.001               |
| Excluding Cixian    | 0.75(0.72-0.79)         | <0.001               | 0.42(0.38-0.46)         | <0.001               |
| Excluding Feicheng  | 0.77(0.73-0.81)         | <0.001               | 0.45(0.41-0.49)         | <0.001               |
| Excluding Linzhou   | 0.72(0.68-0.76)         | <0.001               | 0.40(0.37-0.44)         | <0.001               |
| Excluding Yangcheng | 0.79(0.75-0.83)         | <0.001               | 0.42(0.38-0.45)         | <0.001               |
| Excluding Yangzhong | 0.79(0.74-0.82)         | <0.001               | 0.42(0.39-0.46)         | <0.001               |
| Excluding Yanting   | 0.82(0.78-0.87)         | <0.001               | 0.48(0.44-0.52)         | <0.001               |

<sup>a</sup> Relative risks were compared between the screening group and the control group.

<sup>b</sup> P values have not been corrected for multiple testing.

**Table S4. Baseline characteristics of screened and not screened subjects before and after matching on propensity score**

| Baseline characteristics | Unmatched      |                    | P value | Propensity score-matched |                    | P value |
|--------------------------|----------------|--------------------|---------|--------------------------|--------------------|---------|
|                          | Screened group | Not screened group |         | Screened group           | Not screened group |         |
| Number                   | 113340         | 208429             |         | 96300                    | 96300              |         |
| Area, N(%)               |                |                    | <0.001  |                          |                    | 1.000   |
| Cixian                   | 22135(19.53)   | 49788(22.16)       |         | 21657(22.49)             | 21657(22.49)       |         |
| Feicheng                 | 23470(20.71)   | 18718(8.33)        |         | 16787(17.43)             | 16787(17.43)       |         |
| Linzhou                  | 19805(17.47)   | 38333(17.06)       |         | 14965(15.54)             | 14965(15.54)       |         |
| Yangcheng                | 12460(10.99)   | 41081(18.28)       |         | 12105(12.57)             | 12105(12.57)       |         |
| Yanting                  | 22702(20.03)   | 43500(19.36)       |         | 18902(19.63)             | 18902(19.63)       |         |
| Yangzhong                | 12768(11.27)   | 33257(14.80)       |         | 11884(12.34)             | 11884(12.34)       |         |
| Sex, N(%)                |                |                    | <0.001  |                          |                    | 0.816   |
| Men                      | 51080(45.07)   | 115879(51.58)      |         | 45446(47.19)             | 45395(47.14)       |         |
| Women                    | 62260(54.93)   | 108798(48.42)      |         | 50854(52.81)             | 50905(52.86)       |         |
| Age at entry, N(%)       |                |                    | <0.001  |                          |                    | 0.964   |
| 40-44 yr                 | 22659(19.99)   | 58910(26.22)       |         | 20125(20.9)              | 20074(20.85)       |         |
| 45-49 yr                 | 22977(20.27)   | 45037(20.05)       |         | 19644(20.4)              | 19644(20.4)        |         |
| 50-54 yr                 | 21506(18.97)   | 38599(17.18)       |         | 17252(17.91)             | 17395(18.06)       |         |
| 55-59 yr                 | 22250(19.63)   | 36653(16.31)       |         | 18520(19.23)             | 18520(19.23)       |         |
| 60-64 yr                 | 15873(14)      | 25671(11.43)       |         | 13185(13.69)             | 13093(13.6)        |         |
| 65-69 yr                 | 8075(7.12)     | 19807(8.82)        |         | 7574(7.87)               | 7574(7.87)         |         |
| Cohort entry year, N(%)  |                |                    | <0.001  |                          |                    | 1.000   |
| 2005                     | 3210(2.83)     | 16671(7.42)        |         | 3145(3.27)               | 3145(3.27)         |         |
| 2006                     | 8939(7.89)     | 10901(4.85)        |         | 5256(5.46)               | 5205(5.4)          |         |
| 2007                     | 13532(11.94)   | 12410(5.52)        |         | 9142(9.49)               | 9142(9.49)         |         |
| 2008                     | 8194(7.23)     | 7163(3.19)         |         | 5846(6.07)               | 5897(6.12)         |         |
| 2009                     | 9863(8.70)     | 12585(5.60)        |         | 7652(7.95)               | 7652(7.95)         |         |
| 2010                     | 21923(19.34)   | 59205(26.35)       |         | 21029(21.84)             | 21029(21.84)       |         |
| 2011                     | 25268(22.29)   | 62663(27.89)       |         | 23226(24.12)             | 23226(24.12)       |         |
| 2012                     | 22411(19.77)   | 43079(19.17)       |         | 21004(21.81)             | 21004(21.81)       |         |

**Table S5. Relative Risks of incidence and mortality for each cancer type and the number needed to screen based on propensity score matched cohort**

| Characteristic                | Screened (N=96300) |                           | Not screened(N=96300) |                           | Relative risk(95% CI) | P value | NNS (95%CI) <sup>a</sup> |
|-------------------------------|--------------------|---------------------------|-----------------------|---------------------------|-----------------------|---------|--------------------------|
|                               | Cases              | Rate (95% CI)             | Cases                 | Rate (95% CI)             |                       |         |                          |
| Incidence                     |                    |                           |                       |                           |                       |         |                          |
| Upper-gastrointestinal cancer | 1839               | 342.15<br>(326.86-358.15) | 2508                  | 419.32<br>(403.23-436.06) | 0.81<br>(0.77-0.86)   | <0.001  | 130<br>(100-182)         |
| Esophageal cancer             | 941                | 173.85<br>(163.09-185.32) | 1357                  | 225.21<br>(213.54-237.52) | 0.77<br>(0.71-0.84)   | <0.001  | 195<br>(148-284)         |
| Non-cardia gastric cancer     | 360                | 66.17<br>(59.67-73.37)    | 582                   | 96.11<br>(88.61-104.25)   | 0.69<br>(0.60-0.79)   | <0.001  | 334<br>(248-510)         |
| Cardia gastric cancer         | 540                | 99.46<br>(91.41-108.21)   | 571                   | 94.29<br>(86.86-102.35)   | 1.05<br>(0.94-1.19)   | 0.187   | NA <sup>b</sup>          |
| All cancer                    | 3219               | 603.52<br>(583.03-624.73) | 4751                  | 804.70<br>(782.14-827.91) | 0.75<br>(0.72-0.78)   | <0.001  | 50<br>(43-58)            |
| Mortality                     |                    |                           |                       |                           |                       |         |                          |
| Upper-gastrointestinal cancer | 610                | 113.63<br>(104.96-123.01) | 1282                  | 218.49<br>(206.85-230.79) | 0.52<br>(0.47-0.57)   | <0.001  | 95<br>(84-111)           |
| Esophageal cancer             | 312                | 58.12<br>(52.01-64.94)    | 691                   | 117.77<br>(109.31-126.88) | 0.49<br>(0.43-0.56)   | <0.001  | 168<br>(142-205)         |
| Non-cardia gastric cancer     | 141                | 26.26<br>(22.27-30.98)    | 343                   | 58.46<br>(52.59-64.98)    | 0.45<br>(0.37-0.55)   | <0.001  | 311<br>(251-405)         |
| Cardia gastric cancer         | 157                | 29.25<br>(25.01-34.2)     | 248                   | 42.27<br>(37.32-47.87)    | 0.69<br>(0.56-0.85)   | <0.001  | 768<br>(499-1655)        |
| All cancer                    | 1202               | 223.90<br>(211.59-236.92) | 2434                  | 414.83<br>(398.67-431.64) | 0.54<br>(0.50-0.58)   | <0.001  | 52<br>(47-59)            |

<sup>a</sup>Number needed to be screened to prevent one event in the not screened group<sup>b</sup> Not available

**Table S6. Comparison of potential risk factors between the screened and unscreened subjects<sup>a</sup>**

| Characteristic               | Screened(N=3179) |       | Not screened(N=3280) |       | P value |
|------------------------------|------------------|-------|----------------------|-------|---------|
|                              | No               | %     | No                   | %     |         |
| Sex                          |                  |       |                      |       | 0.002   |
| Male                         | 1415             | 44.51 | 1586                 | 48.35 |         |
| Female                       | 1764             | 55.49 | 1694                 | 51.65 |         |
| Age at entry                 |                  |       |                      |       | <0.001  |
| 40-49 yr                     | 1380             | 42.07 | 1512                 | 47.56 |         |
| 50-59 yr                     | 1158             | 35.30 | 1283                 | 40.36 |         |
| 60-69 yr                     | 742              | 22.62 | 384                  | 12.08 |         |
| Marriage                     |                  |       |                      |       | <0.001  |
| Married                      | 2984             | 93.87 | 2968                 | 90.49 |         |
| Single/divorced/widowed      | 195              | 6.13  | 312                  | 9.51  |         |
| Household members, No.       |                  |       |                      |       | <0.001  |
| <5                           | 1847             | 58.17 | 2123                 | 64.75 |         |
| ≥5                           | 1328             | 41.83 | 1156                 | 35.25 |         |
| Household income             |                  |       |                      |       | <0.001  |
| ≤¥5000                       | 1773             | 55.84 | 1433                 | 43.97 |         |
| >¥5000                       | 1402             | 44.16 | 1826                 | 56.03 |         |
| Education                    |                  |       |                      |       | 0.293   |
| No primary education         | 478              | 14.57 | 493                  | 15.51 |         |
| Primary education or more    | 2802             | 85.43 | 2686                 | 84.49 |         |
| Drinking water               |                  |       |                      |       | <0.001  |
| Shallow well or lake water   | 1719             | 54.24 | 520                  | 15.87 |         |
| Deep well or piped water     | 1450             | 45.76 | 2756                 | 84.13 |         |
| Smoking                      |                  |       |                      |       | 0.440   |
| No                           | 2354             | 74.05 | 2401                 | 73.2  |         |
| Yes                          | 825              | 25.95 | 879                  | 26.8  |         |
| Drinking alcohol             |                  |       |                      |       | 0.626   |
| No                           | 2757             | 86.73 | 2858                 | 87.13 |         |
| Yes                          | 422              | 13.27 | 422                  | 12.87 |         |
| Diseases of digestive system |                  |       |                      |       | 0.914   |
| No                           | 2737             | 86.1  | 2827                 | 86.19 |         |
| Yes                          | 442              | 13.9  | 453                  | 13.81 |         |
| Family history of cancer     |                  |       |                      |       | <0.001  |
| No                           | 1974             | 62.09 | 2509                 | 76.49 |         |
| Yes                          | 1205             | 37.91 | 771                  | 23.51 |         |

<sup>a</sup>Target subjects interviewed in 2005 in Cixian and Linzhou

**Figure S1. Location of selected centers**

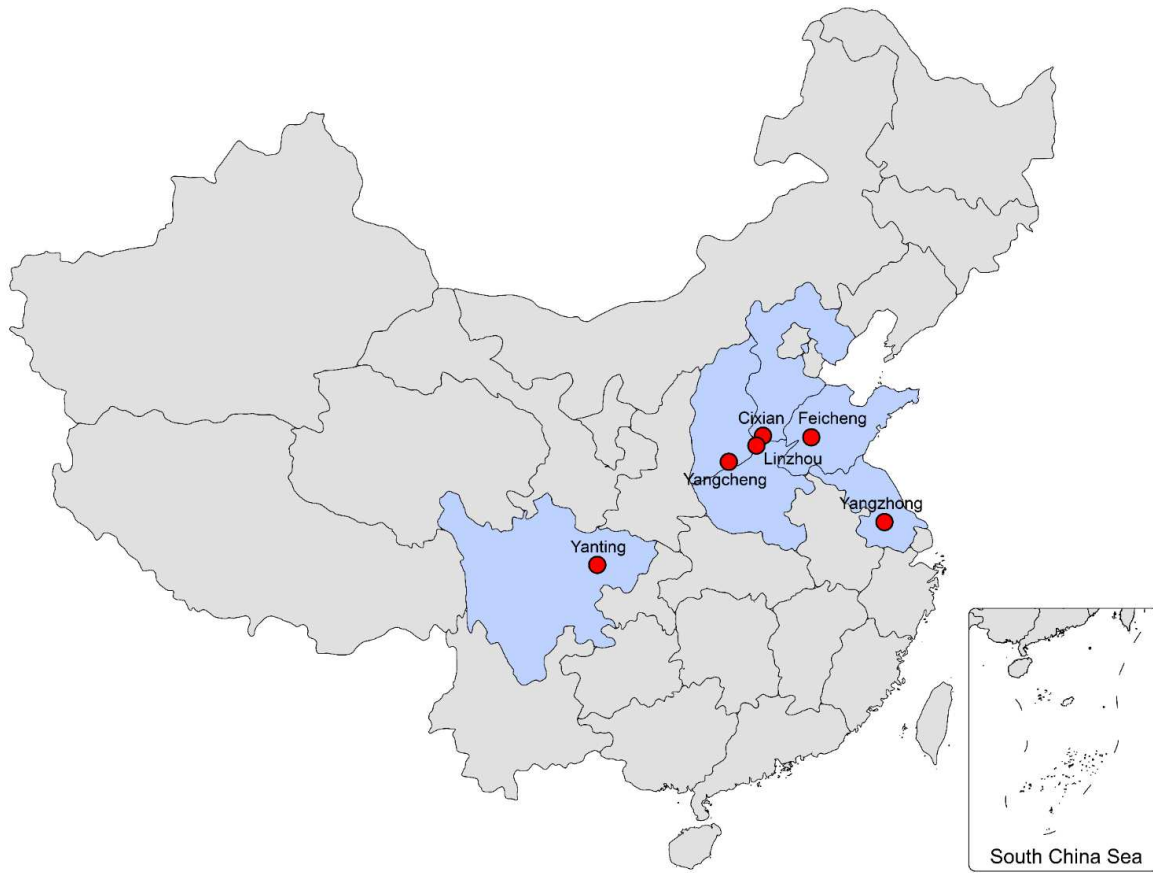



**Figure S2. Cumulative incidence and mortality from all-site cancer**

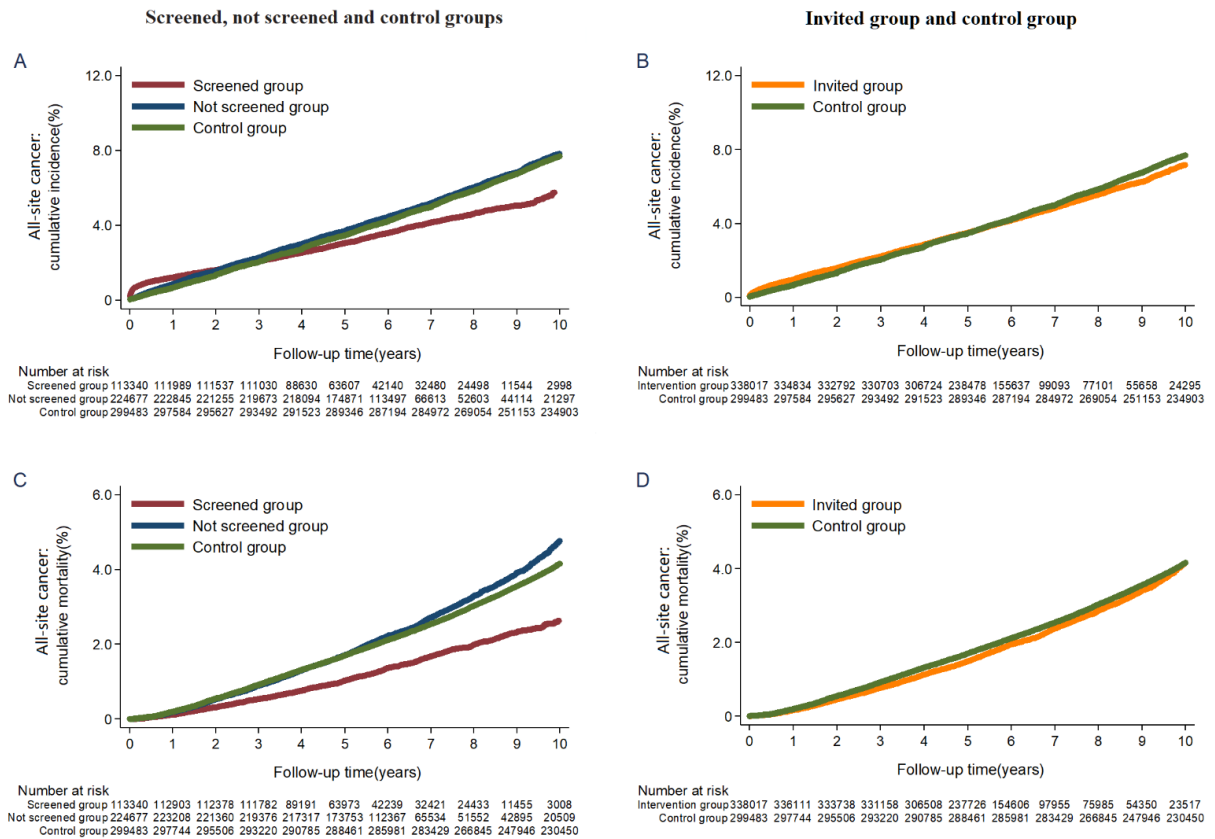

**Figure S3. Cumulative incidence and mortality of upper-gastrointestinal cancer, esophageal cancer, non-cardia gastric cancer and cardia gastric cancer based on propensity score-matched cohort**

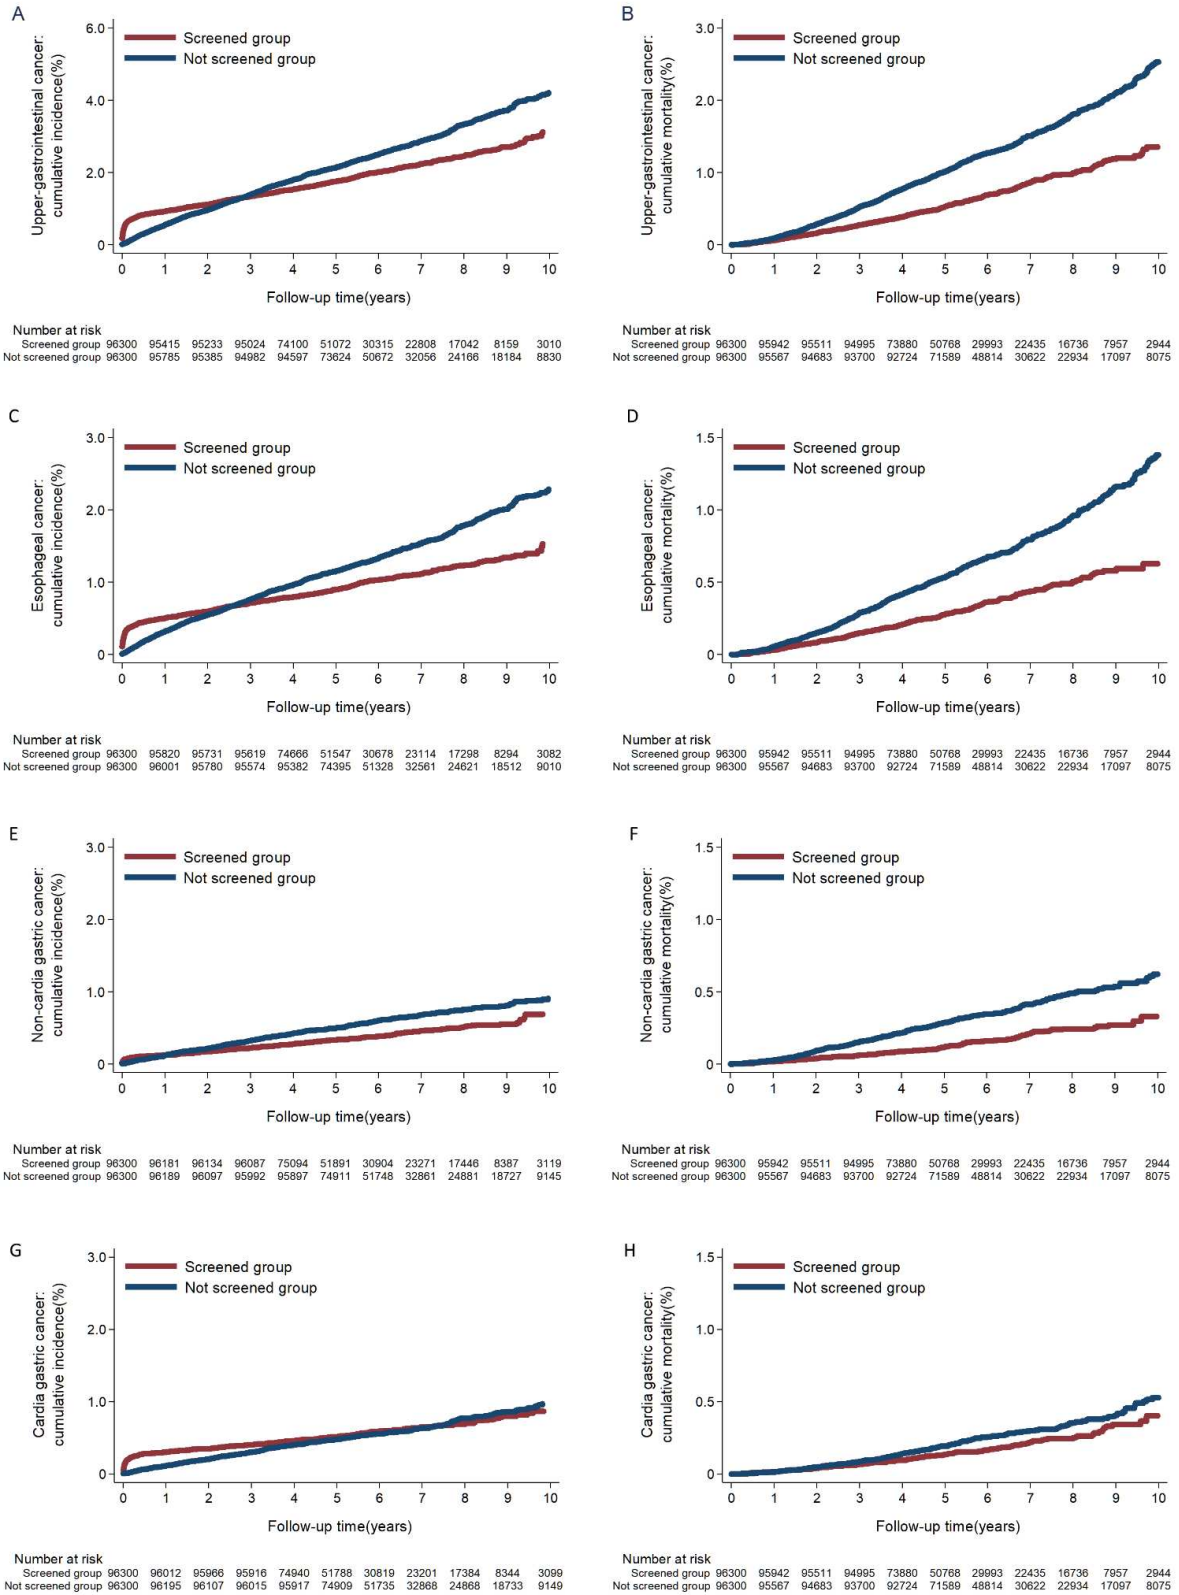

**Figure S4. Cumulative incidence and mortality from all-site cancer based on propensity score-matched cohort**

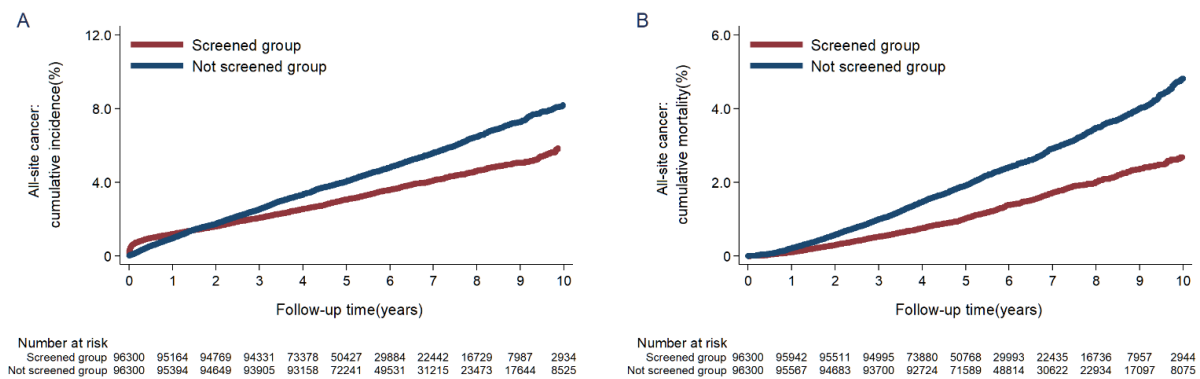

Supplement: gutjnl-2019-320200supp001.pdf [file gutjnl-2019-320200supp001.pdf]
